# Supplementary material for: CSF hyperdynamics in rats mimicking the obesity and androgen excess characteristic of patients with idiopathic intracranial hypertension
Source: PubMed Central journal article supplement (PMC10810013; doi:10.1186/s12987-024-00511-1), 2024-01-25
Supplement: 12987_2024_511_MOESM1_ESM.pdf [file 12987_2024_511_MOESM1_ESM.pdf]

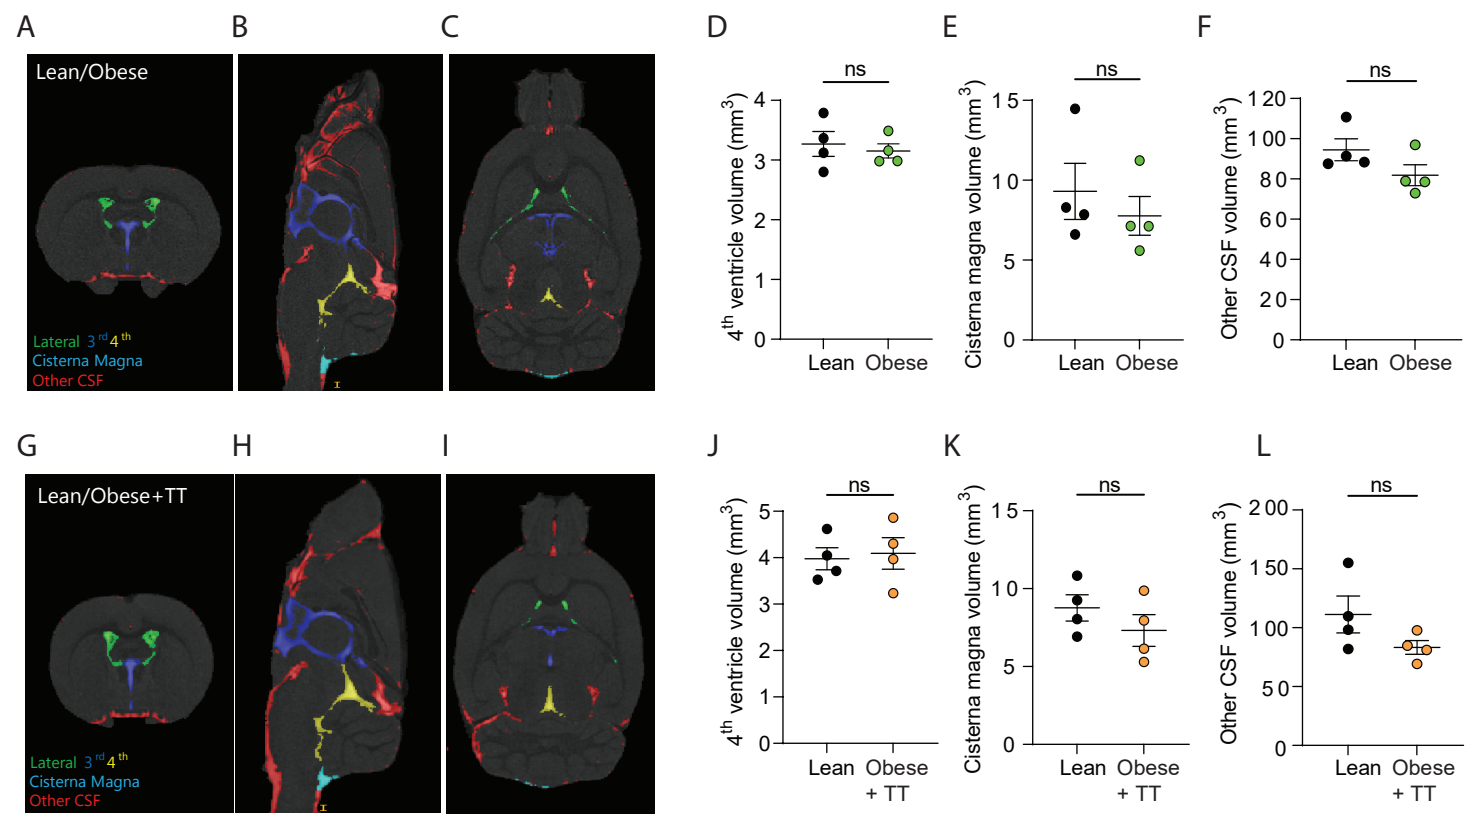

**Additional file 1. T<sub>2</sub> MRI of Zucker rats brains:** Defined CSF volumes in Zucker rat brains used for quantification of CSF subvolumes **A** Coronal, **B** sagittal and **C** axial cross sections of obese Zucker rat brains. Quantification of **D** fourth ventricle, **E** cisterna magna and **F** other (excluding all other specifically quantified volumes) CSF volumes in Zucker lean and obese rats (n=4 of each group). **G** Coronal, **H** sagittal and **I** axial cross sections of Zucker rat brains from vehicle/testosterone treated cohort. Quantification of **D** fourth ventricle, **E** cisterna magna and **F** other (excluding all other specifically quantified volumes) CSF volumes in Zucker lean and testosterone-treated obese (Obese+TT) rats (n=4 of each group). Statistical significance evaluated with Student's unpaired t-test. Results are shown as mean ± SEM ns = not significant.
