# Supplementary material for: CSF hyperdynamics in rats mimicking the obesity and androgen excess characteristic of patients with idiopathic intracranial hypertension
Source: PubMed Central journal article supplement (PMC10810013; doi:10.1186/s12987-024-00511-1), 2024-01-25
Supplement: 12987_2024_511_MOESM3_ESM.pdf [file 12987_2024_511_MOESM3_ESM.pdf]

**A**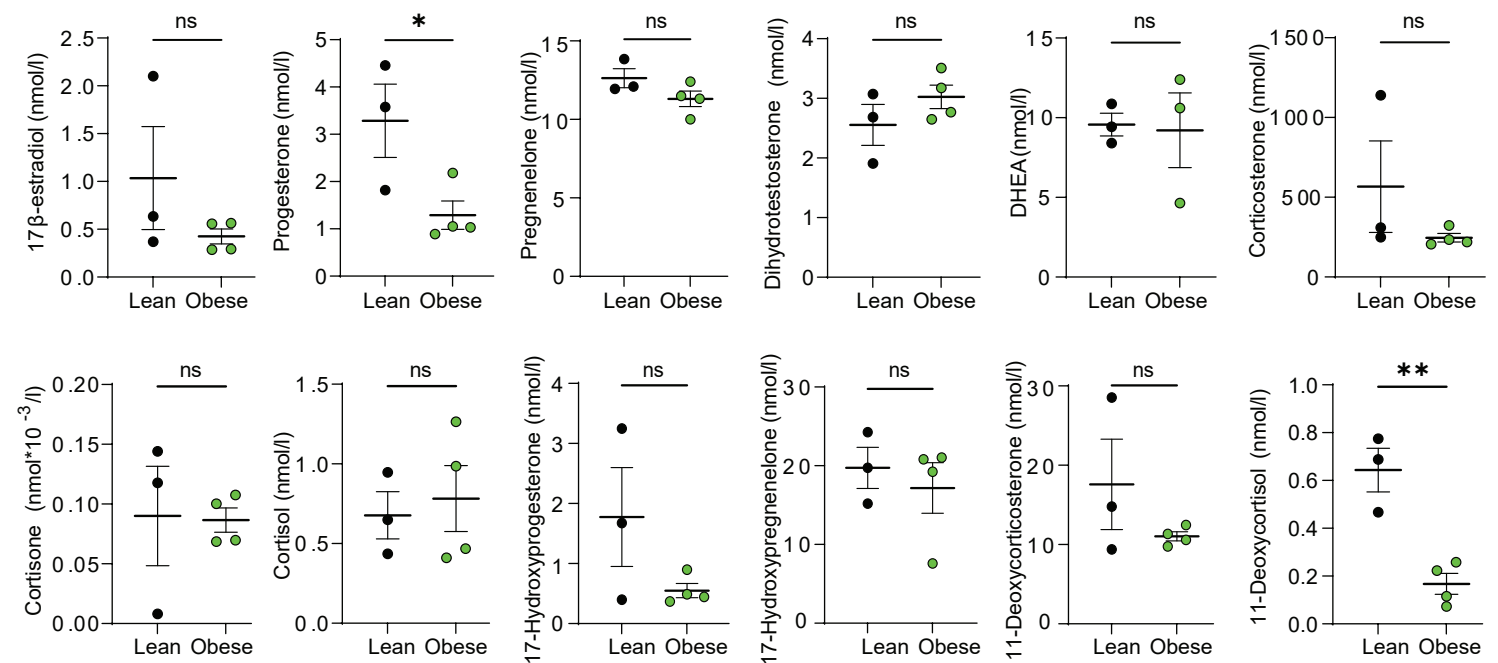**B**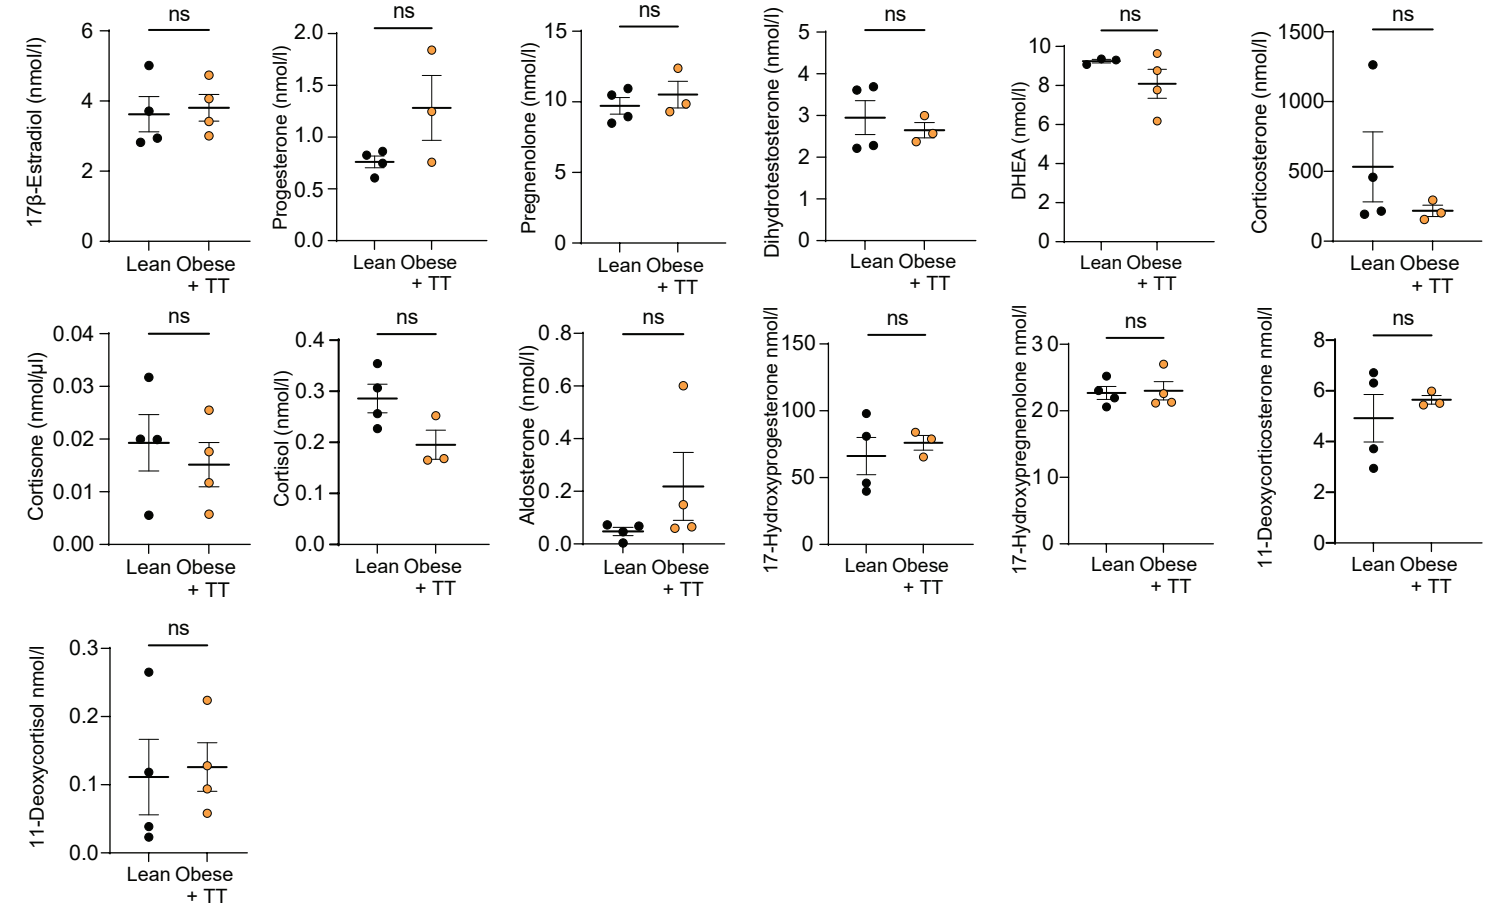

**Additional file 3. Mass spectrometry analysis of CSF hormones: A** CSF hormone levels in lean and obese Zucker rats. **B** CSF hormone levels in lean and testosterone-treated obese (obese+TT) Zucker rats. Progesterone and 11-deoxycortisol are significantly decreased in the CSF of obese Zucker rats. Statistical significance evaluated with Student's t-test. Results are shown as mean ± SEM. \* P < 0.05, \*\* P < 0.01, ns = not significant.
